# Supplementary material for: Rose-like, ruthenium-modified cobalt nitride nanoflowers grown in situ on an MXene matrix for efficient and stable water electrolysis
Source: Royal Society of Chemistry journal article supplement (doi:10.1039/d1ta05243h), 2021-01-01
Supplement: d1ta05243h1.pdf [file d1ta05243h1.pdf]

## Supporting Information

### **Rose-like, ruthenium-modified cobalt nitride nanoflowers grown *in situ* on an MXene matrix for efficient and stable water electrolysis**

Liang Yan,<sup>a,#,\*</sup> and Bing Zhang<sup>b,#</sup>

<sup>a</sup> School of Chemistry and Materials Engineering, Guangdong Provincial Key Laboratory of Electronic Functional Materials and Devices, Huizhou University, No. 46 Yanda Road, Huizhou, 516007, China.

<sup>b</sup> School of Materials and Energy, Guangdong University of Technology, No. 100 Waihuan Xi Road, Guangzhou Higher Education Mega Center, Guangzhou, 510006, China.

\* E-mail: yanliang@hzu.edu.cn (L. Yan)

#These authors contributed equally to this work.

#### **Experimental section**

##### *Materials*

Titanium aluminum carbide ( $\text{Ti}_3\text{AlC}_2$ ,  $\geq 98\%$ ) was purchased from Foshan Xinxing Technology Co., Ltd (Foshan, China). Cobalt (II) nitrate hexahydrate ( $\text{Co}(\text{NO}_3)_2 \cdot 6\text{H}_2\text{O}$ ), N-methyl pyrrolidone (NMP), urea ( $\text{CH}_4\text{N}_2\text{O}$ ) and ethanol ( $\text{C}_2\text{H}_5\text{OH}$ ,  $>99.7\%$ ) were obtained from Guangzhou Chemical Reagent Factory (Guangzhou, China). Pt/C (20 wt%),  $\text{RuO}_2$ ,  $\text{RuCl}_3$  and Nafion solution (5 wt%) were purchased from Sigma-Aldrich. Carbon papers (CP) were purchased from Toray

Industries, Inc. (Tokyo, Japan). All chemicals and materials were used as purchased without further purification.

#### *Synthesis of $Ti_3C_2T_x$ MXene nanosheets*

The  $Ti_3C_2T_x$  MXene was synthesized by etching Al layer from  $Ti_3AlC_2$  with a mixture of LiF and HCl. Specifically, 2.0 g LiF was added to 40 mL of 9.0 M HCl by stirring for several minutes. Subsequently, 1.0 g  $Ti_3AlC_2$  powder was slowly added into the above solution. After etching for 24 h at 35 °C in water bath under magnetic stirring, the multilayer  $Ti_3C_2T_x$  MXene was washed and centrifuged with deionized water for several times until the pH of the supernatant was approximately 6. Next, the obtained sediment was dispersed in 200 mL of deionized water and kept under bath sonicated for 1 h under  $N_2$  gas protection. The dark green supernatant containing monolayer or few-layer  $Ti_3C_2T_x$  MXene nanosheets was collected by centrifuging for 1 h at 3500 rpm. The obtained  $Ti_3C_2T_x$  MXene solution was reserved at 0 °C in the refrigerator followed by freeze-drying before use.

#### *Synthesis of Ru-Co LDH/ $Ti_3C_2T_x$ MXene*

The Ru-Co LDH/ $Ti_3C_2T_x$  MXene was synthesized through a simple oil bath method by using  $Co(NO_3)_2 \cdot 6H_2O$ ,  $RuCl_3$ , and  $Ti_3C_2T_x$  MXene as the precursors for the in situ growth Ru-Co LDH nanoflowers on the surface of  $Ti_3C_2T_x$  MXene. Typically, 0.2 mmol  $Co(NO_3)_2 \cdot 6H_2O$ ,  $RuCl_3$  with different contents (0, 0.022, 0.05, and 0.086 mmol  $RuCl_3$  match to 0, 10%, 20%, and 30%, respectively), and 2 mmol urea were dissolved in 20 mL of  $Ti_3C_2T_x$  MXene/NMP dispersion (3 mg  $mL^{-1}$ ). The above mentioned solution was then refluxed at 100 °C for 5 h in a three-necked flask under stirring in  $N_2$

flow. The final Ru-Co LDH/Ti<sub>3</sub>C<sub>2</sub>T<sub>x</sub> MXene was obtained by centrifugation washed using deionized water and ethanol for five times each followed by freeze-drying. Subsequently, the Ru-Co LDH/Ti<sub>3</sub>C<sub>2</sub>T<sub>x</sub> MXene precursor was placed at the center of a furnace tube and then heated to 380 °C at the rate of 5 °C min<sup>-1</sup> and maintained at this temperature for 2 h under a flowing NH<sub>3</sub> atmosphere. Finally, the resulting product Ru-CoN/Ti<sub>3</sub>C<sub>2</sub>T<sub>x</sub> MXene was obtained. For comparison, the bare CoN was prepared by similar approach except that pristine Co LDH instead of Co LDH/Ti<sub>3</sub>C<sub>2</sub>T<sub>x</sub> MXene was used as the precursor.

#### *Materials characterization*

The morphology and nanostructure of samples were characterized with field-emission scanning electron microscopy (FESEM, Hitachi SU8220) and transmission electron microscopy (TEM, FEI Talos F200S) coupled with energy dispersive X-ray (EDX) spectroscopy. Powder X-ray diffraction (XRD) patterns were recorded using X-ray diffractometer (D8 Advance, Bruker) with a Cu  $\alpha$  radiation source ( $\lambda = 0.1541$  nm) at a scan rate of 8° min<sup>-1</sup>. X-ray photoelectron spectra (XPS) were performed with a Thermo Fischer ESCALAB 250Xi spectrometer with Al  $\alpha$  radiation source. Raman spectrum were recorded on a LabRAM HR Evolution (Horiba Jobin Yvon, France) using 532 nm laser source.

#### *Electrochemical measurements*

All electrochemical measurements were carried out at room temperature in a standard three-electrode cell controlled by PGSTAT302N potentiostat/galvanostat (Metrohm Autolab, Netherlands) electrochemical workstation. A graphite rod and a reversible

hydrogen electrode (RHE) and 1.0 M KOH were used as the counter electrode and reference electrode, respectively. A catalyst ink was prepared by ultrasonically dispersed the mixture of 5 mg of the sample, 10  $\mu\text{L}$  of 5 wt% Nafion solution and 990  $\mu\text{L}$  of ethanol for at least 1 h. Then 10  $\mu\text{L}$  of the catalyst ink was carefully deposited on the surface of a glassy carbon (GC) rotating disk electrode (RDE) with a diameter of 5 mm, and dried naturally. Before and during the HER or OER test, freshly prepared 1.0 M KOH solution was bubbled with Ar or  $\text{O}_2$  flow, respectively. After twenty CV scans, the linear sweep voltammetry (LSV) was obtained at a rotating rate of 1600 rpm with a scan rate of  $5 \text{ mV s}^{-1}$ . All polarization curves were corrected with 90%  $iR$  compensation. The double-layer capacitances ( $C_{dl}$ ) were determined by CV method in the non-faradaic potential region with scan rates from 10 to  $90 \text{ mV s}^{-1}$ . Electrochemical impedance spectroscopy (EIS) was tested in a frequency range from 100 kHz to 0.1 Hz by applying an AC voltage of 5 mV amplitude. The stability tests were carried out under constant current densities of  $-10$  or  $10 \text{ mA cm}^{-2}$  for HER or OER, respectively. For the two-electrode electrolysis, the as-prepared Ru-CoN/Ti<sub>3</sub>C<sub>2</sub>T<sub>x</sub> MXene was used as both the anode and cathode.

#### *Fabrication of Ru-CoN/Ti<sub>3</sub>C<sub>2</sub>T<sub>x</sub> MXene/CP, Pt/C/CP, and RuO<sub>2</sub>/CP electrodes*

Ru-CoN/Ti<sub>3</sub>C<sub>2</sub>T<sub>x</sub> MXene/CP was prepared by drop-casting method. Typically, 2 mg Ru-CoN/Ti<sub>3</sub>C<sub>2</sub>T<sub>x</sub> MXene was dispersed in 0.99 mL ethanol with 10  $\mu\text{L}$  5wt% of Nafion solution, and the mixture solution was subsequently ultrasonically at least 30 min to form homogeneous ink. Then, the ink was drop coating onto a CP ( $1 \times 1 \text{ cm}^2$ ). The Pt/C/CP and RuO<sub>2</sub>/CP electrodes were also prepared through the same procedure.

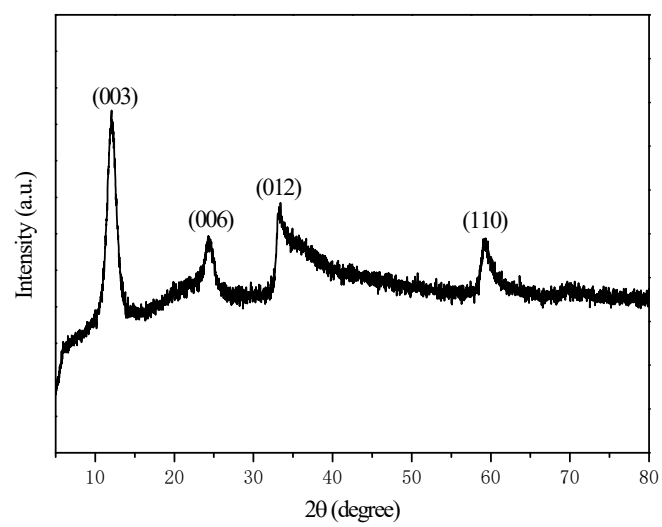

**Figure S1.** XRD pattern of Ru-Co LDH/Ti<sub>3</sub>C<sub>2</sub>T<sub>x</sub> MXene.

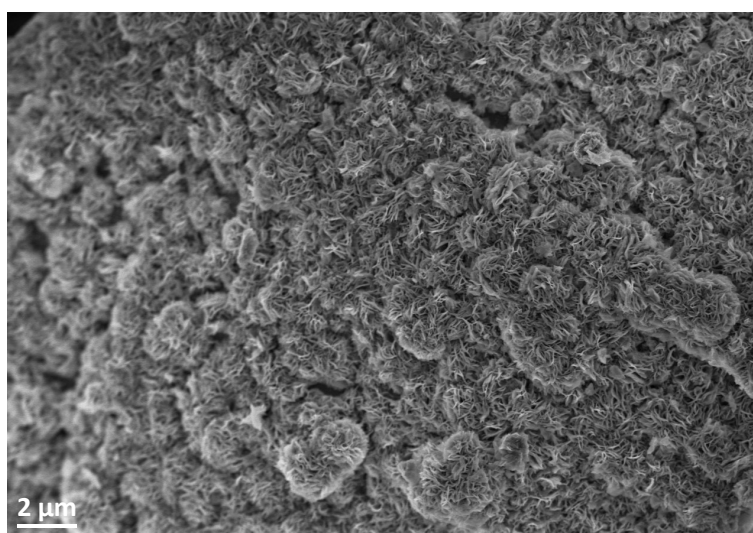

**Figure S2.** SEM image of CoN/Ti<sub>3</sub>C<sub>2</sub>T<sub>x</sub> MXene.

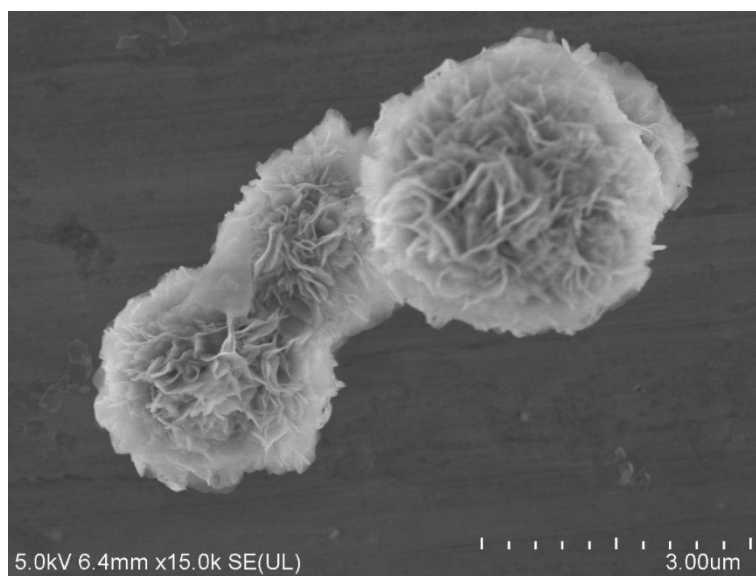

**Figure S3.** SEM image of bare CoN.

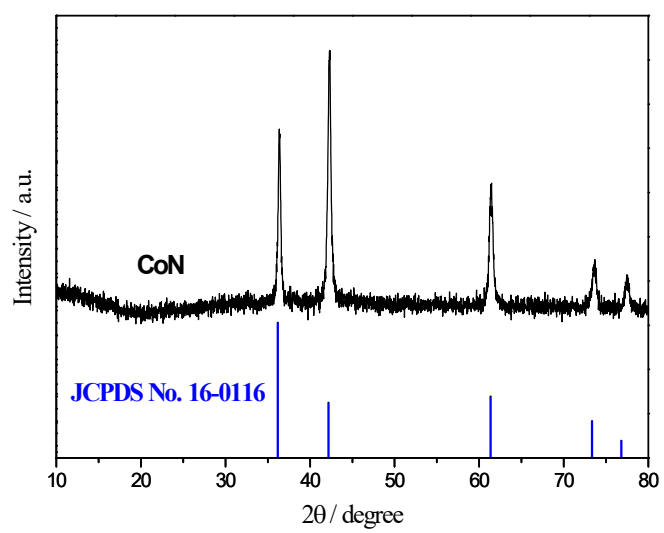

**Figure S4.** XRD pattern of bare CoN.

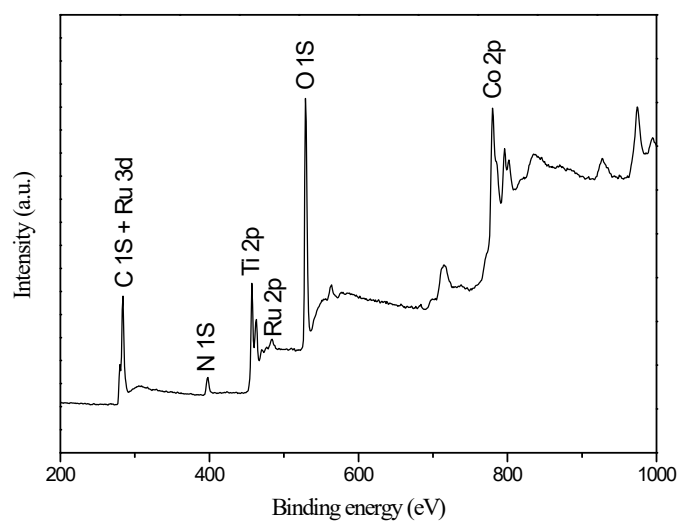

**Figure S5.** Overall XPS spectra of Ru-CoN/Ti<sub>3</sub>C<sub>2</sub>T<sub>x</sub> MXene.

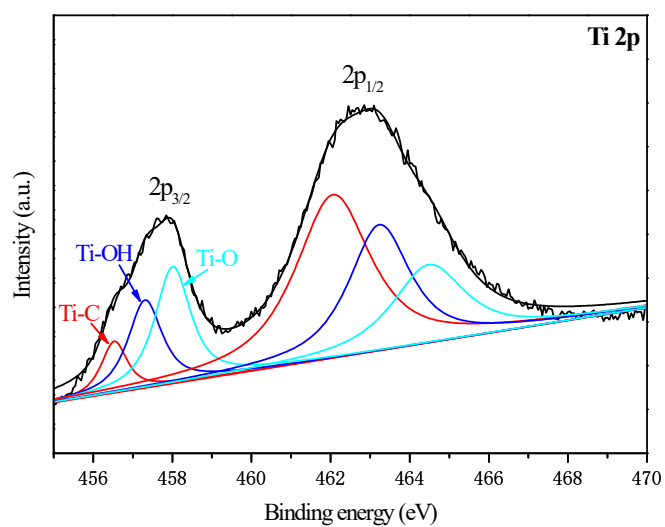

**Figure S6.** High-resolution XPS spectra of Ti 2p for Ru-CoN/Ti<sub>3</sub>C<sub>2</sub>T<sub>x</sub> MXene.

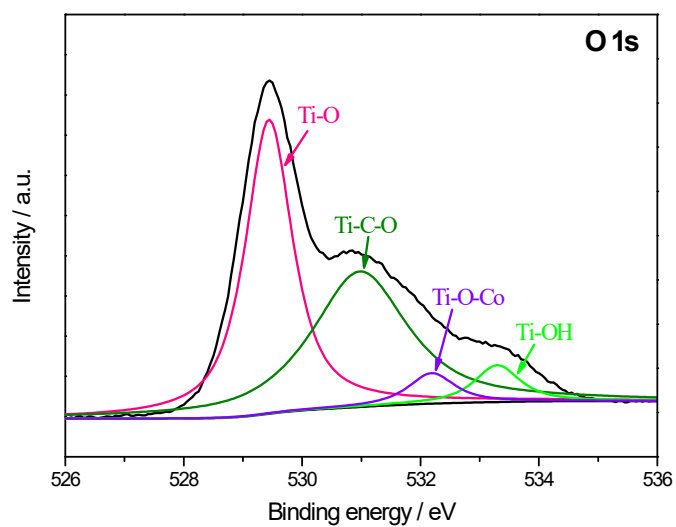

**Figure S7.** High resolution XPS spectrum of O 1s for Ru-CoN/Ti<sub>3</sub>C<sub>2</sub>T<sub>x</sub> MXene.

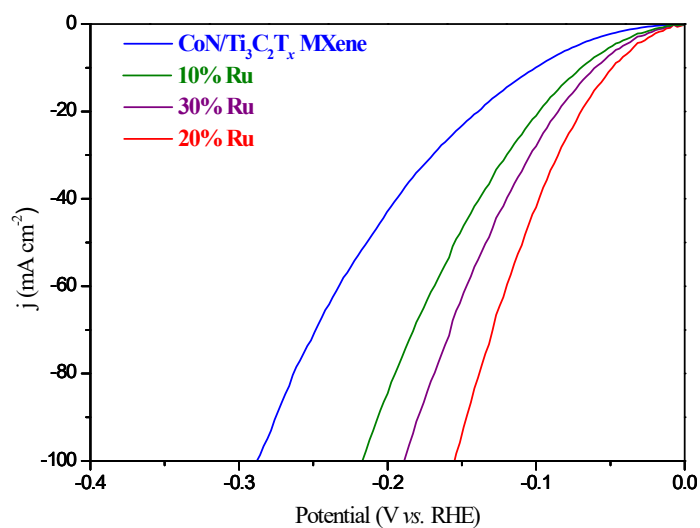

**Figure S8.** HER polarization curves of the CoN/Ti<sub>3</sub>C<sub>2</sub>T<sub>x</sub> MXene with different Ru contents.



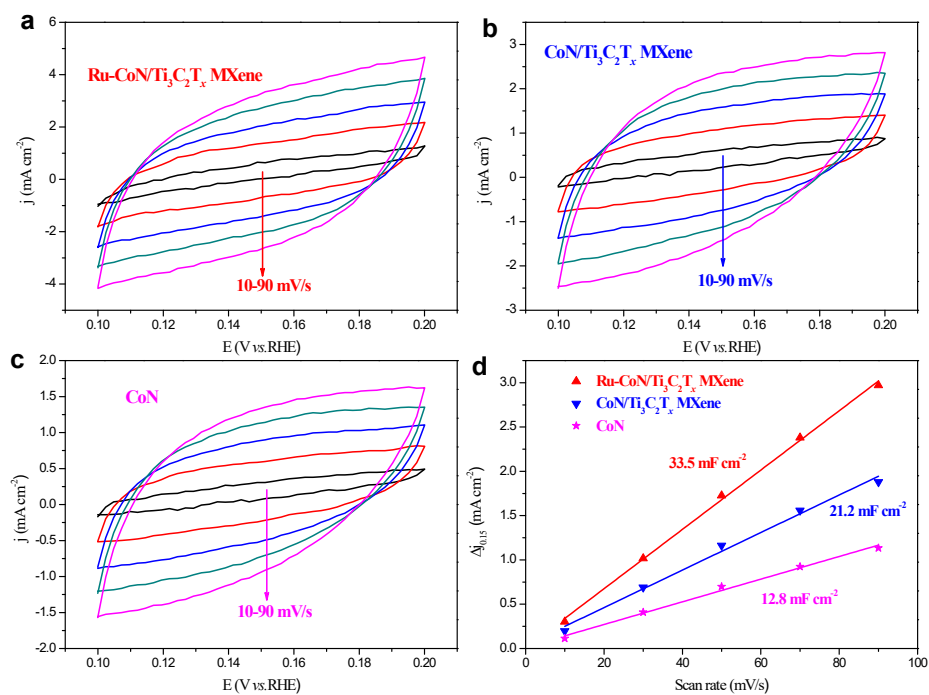

**Figure S9.** CV curves of (a) Ru-CoN/Ti<sub>3</sub>C<sub>2</sub>T<sub>x</sub> MXene, (b) CoN/Ti<sub>3</sub>C<sub>2</sub>T<sub>x</sub> MXene and (c) CoN with scan rates of 10, 30, 50, 70 and 90 mV s<sup>-1</sup> in 1.0 M KOH. (d) Plots of the capacitive currents at 0.15 V as a function of scan rate for Ru-CoN/Ti<sub>3</sub>C<sub>2</sub>T<sub>x</sub> MXene, CoN/Ti<sub>3</sub>C<sub>2</sub>T<sub>x</sub> MXene, and CoN.

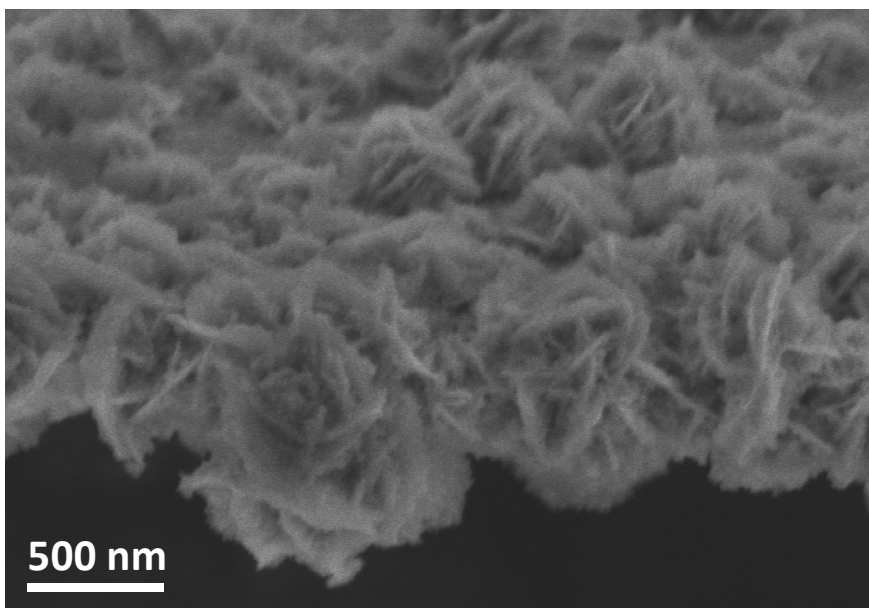

**Figure S10.** SEM image of Ru-CoN/Ti<sub>3</sub>C<sub>2</sub>T<sub>x</sub> MXene after HER test.

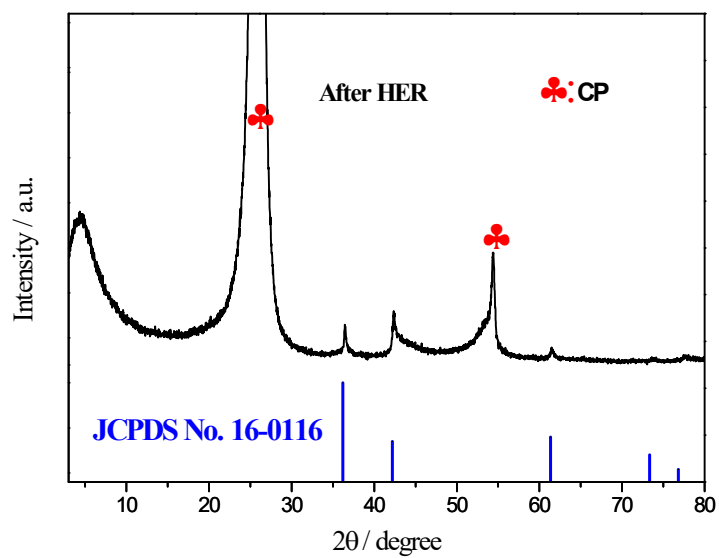

**Figure S11.** XRD pattern of Ru-CoN/Ti<sub>3</sub>C<sub>2</sub>T<sub>x</sub> MXene on CP after HER test.

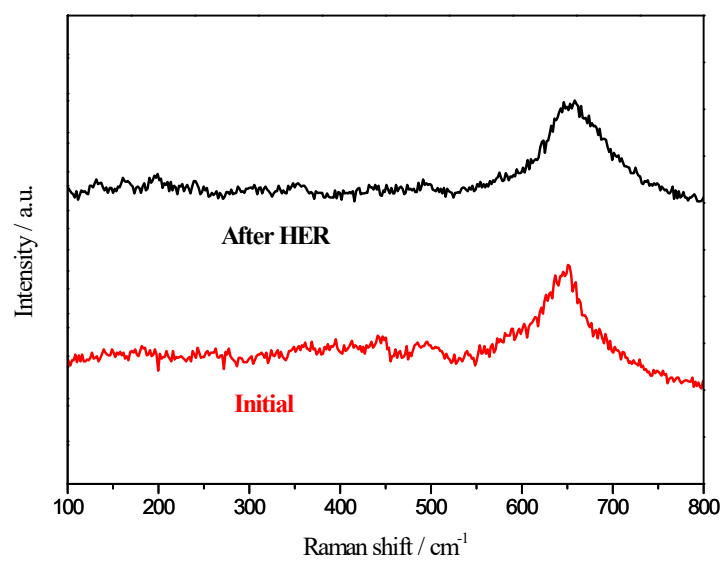

**Figure S12.** Raman spectra of Ru-CoN/Ti<sub>3</sub>C<sub>2</sub>T<sub>x</sub> MXene before and after HER test.

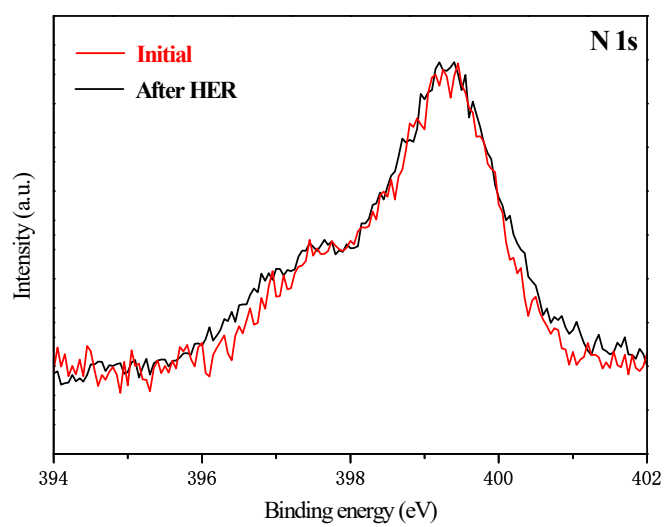

**Figure S13.** N 1s XPS spectra of Ru-CoN/Ti<sub>3</sub>C<sub>2</sub>T<sub>x</sub> MXene before and after HER test.

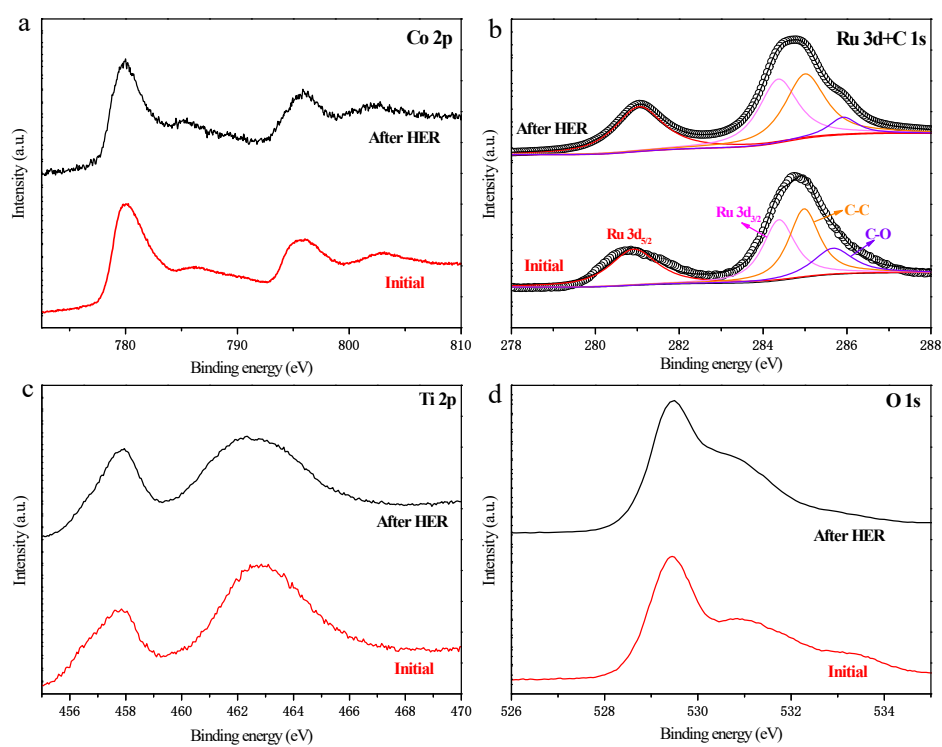

**Figure S14.** High-resolution XPS spectra of (a) Co 2p, (b) Ru 3d + C 1s, (c) Ti 2p, and (d) O 1s for Ru-CoN/Ti<sub>3</sub>C<sub>2</sub>T<sub>x</sub> MXene before and after HER test.

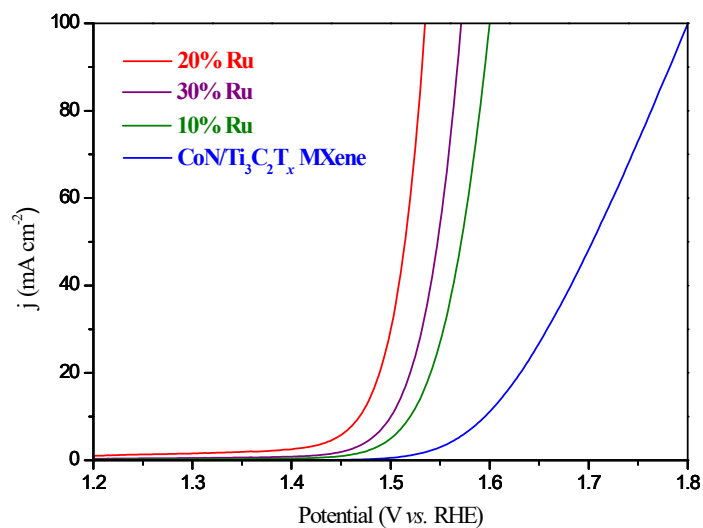

**Figure S15.** OER polarization curves of the CoN/Ti<sub>3</sub>C<sub>2</sub>T<sub>x</sub> MXene with different Ru contents.

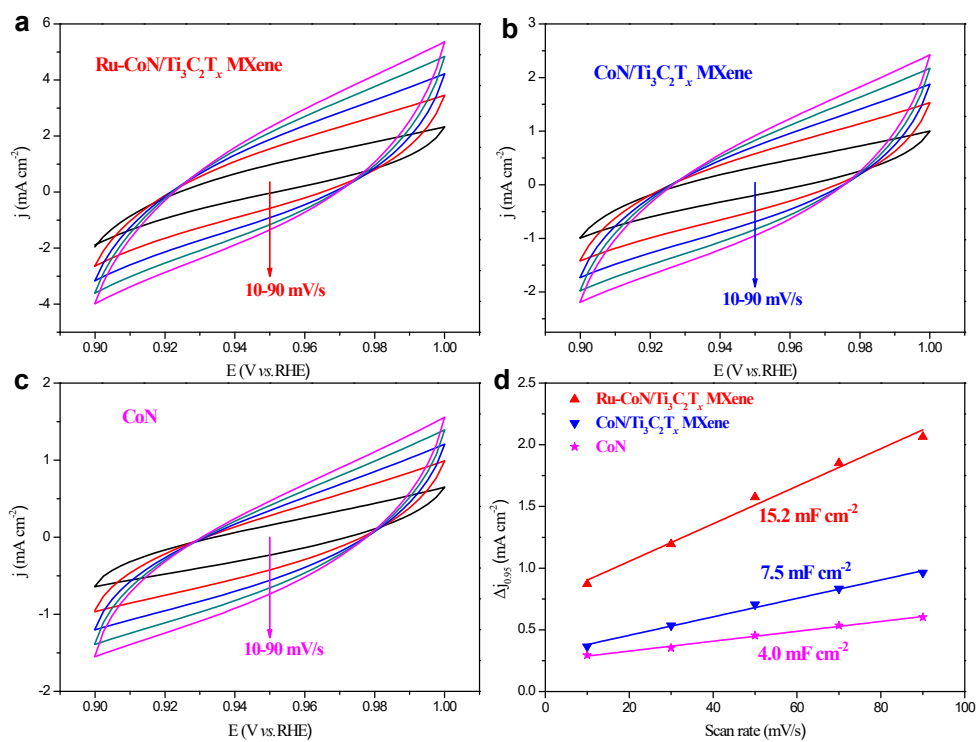

**Figure S16.** CV curves of (a) Ru-CoN/Ti<sub>3</sub>C<sub>2</sub>T<sub>x</sub> MXene, (b) CoN/Ti<sub>3</sub>C<sub>2</sub>T<sub>x</sub> MXene and (c) CoN with scan rates of 10, 30, 50, 70 and 90 mV s<sup>-1</sup> in 1.0 M KOH. (d) Plots of the capacitive currents at 0.95 V as a function of scan rate for Ru-CoN/Ti<sub>3</sub>C<sub>2</sub>T<sub>x</sub> MXene, CoN/Ti<sub>3</sub>C<sub>2</sub>T<sub>x</sub> MXene and CoN.

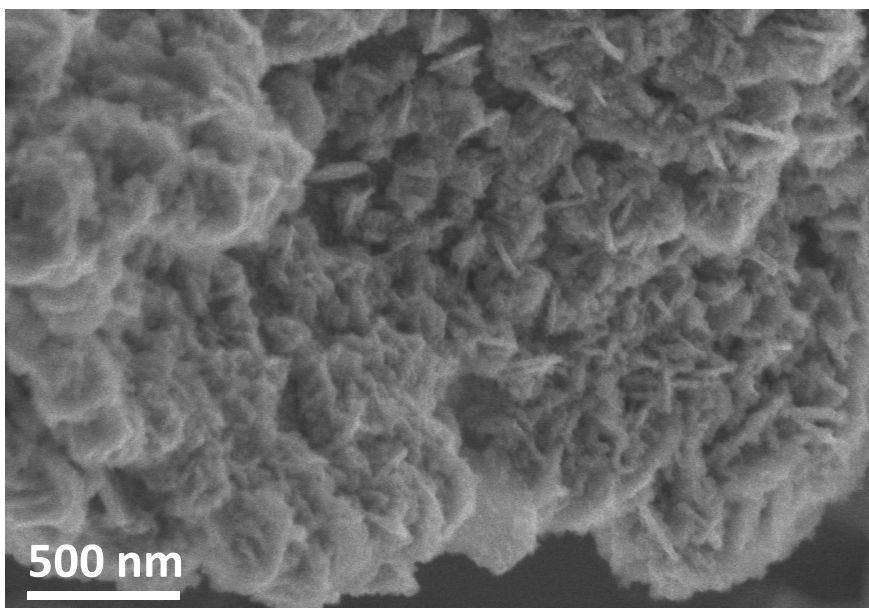

**Figure S17.** SEM image of Ru-CoN/Ti<sub>3</sub>C<sub>2</sub>T<sub>x</sub> MXene after OER test.

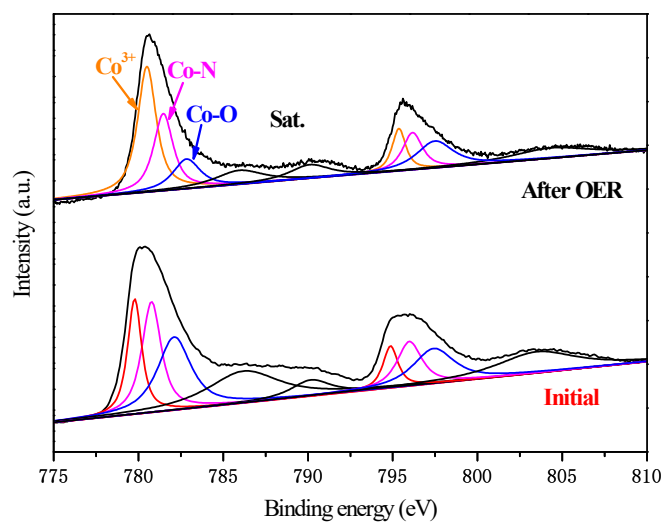

**Figure S18.** High resolution Co 2p XPS spectra of the Ru-CoN/Ti<sub>3</sub>C<sub>2</sub>T<sub>x</sub> MXene before and after the OER test.

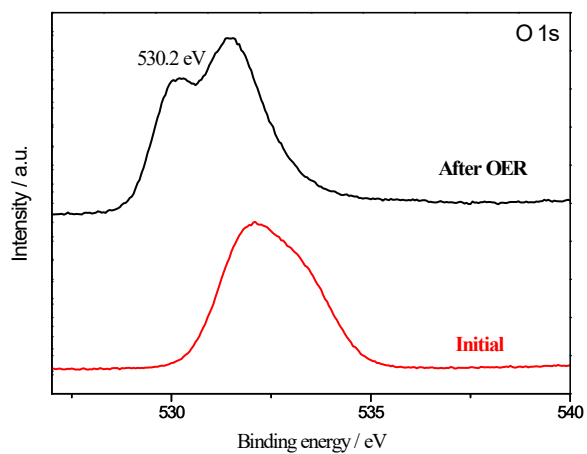

**Figure S19.** High resolution O 1s XPS spectra of Ru-CoN/Ti<sub>3</sub>C<sub>2</sub>T<sub>x</sub> MXene before and after OER test.

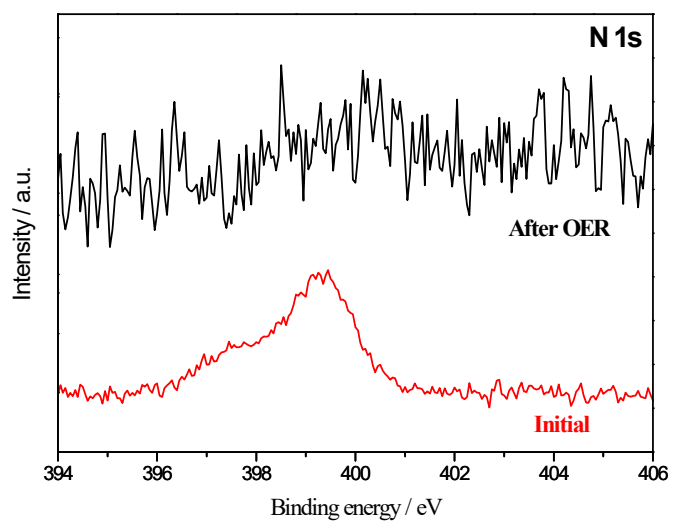

**Figure S20.** High resolution N 1s XPS spectra of the Ru-CoN/Ti<sub>3</sub>C<sub>2</sub>T<sub>x</sub> MXene before and after the OER test.

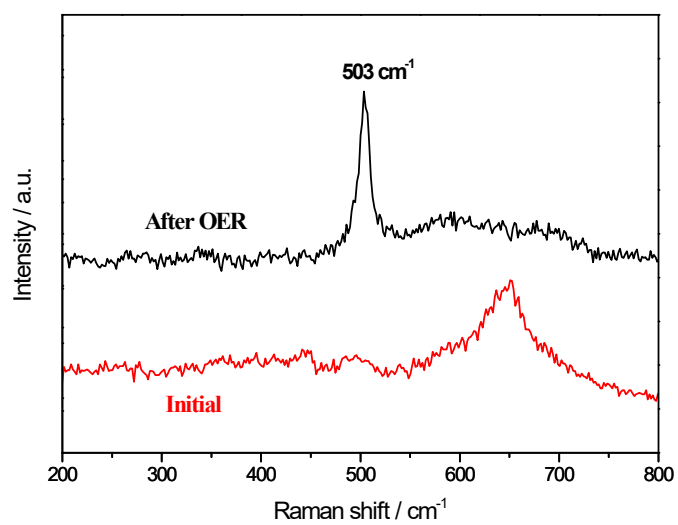

**Figure S21.** Raman spectra of the Ru-CoN/Ti<sub>3</sub>C<sub>2</sub>T<sub>x</sub> MXene before and after the OER test.

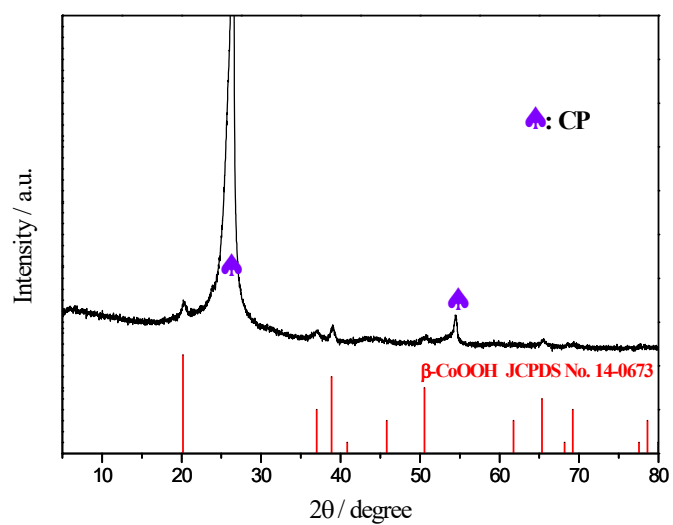

**Figure S22.** XRD pattern for Ru-CoN/Ti<sub>3</sub>C<sub>2</sub>T<sub>x</sub> MXene@CP electrode after the OER test.



**Table S1.** A comparison of HER performances of Ru-CoN/Ti<sub>3</sub>C<sub>2</sub>T<sub>x</sub> MXene with recently reported TMN-based electrocatalysts in 1.0 M KOH.

| Catalyst                                                    | $\eta$ (mV) at<br>10 mA cm <sup>-2</sup> | Tafel slope<br>mV dec <sup>-1</sup> | Reference                                                  |
|-------------------------------------------------------------|------------------------------------------|-------------------------------------|------------------------------------------------------------|
| Ni <sub>3</sub> FeN-NPs                                     | 158                                      | 42                                  | <i>Adv. Energy Mater.</i> <b>2016</b> , 6, 1502585         |
| NiMoN/CC                                                    | 109                                      | 95                                  | <i>Adv. Energy Mater.</i> <b>2016</b> , 6, 1600221         |
| NC@CuCo <sub>2</sub> N <sub>x</sub> /CF                     | 105                                      | 76                                  | <i>Adv. Funct. Mater.</i> <b>2017</b> , 27, 1704169        |
| Ni <sub>3</sub> N/CMFs/Ni <sub>3</sub> N                    | 115                                      | 52.1                                | <i>J. Mater. Chem. A</i> <b>2017</b> , 5, 9377             |
| Co <sub>5.47</sub> N NP@N-PC                                | 149                                      | 86                                  | <i>ACS Appl. Mater. Interfaces</i> <b>2018</b> , 10, 7134  |
| Co-Ni <sub>3</sub> N/CC                                     | 194                                      | 156                                 | <i>Adv. Mater.</i> <b>2018</b> , 30, 1705516               |
| Ni <sub>3</sub> FeN/r-GO                                    | 94                                       | 90                                  | <i>ACS Nano</i> <b>2018</b> , 12, 245                      |
| Co <sub>3</sub> O <sub>4</sub> -Co <sub>4</sub> N PNSNs/HCC | 90                                       | 57.8                                | <i>J. Mater. Chem. A</i> <b>2019</b> , 7, 775              |
| Ni <sub>3</sub> N                                           | 133                                      | 103                                 | <i>ACS Catal.</i> <b>2019</b> , 9, 9332                    |
| h-MoN@BNCNT                                                 | 118                                      | 59                                  | <i>Adv. Funct. Mater.</i> <b>2019</b> , 29, 1805893        |
| Ni <sub>3</sub> N/NF                                        | 120                                      | 110                                 | <i>ACS Appl. Mater. Interfaces</i> <b>2019</b> , 11, 13168 |
| NiCoN/C                                                     | 103                                      | NA                                  | <i>Adv. Mater.</i> <b>2019</b> , 31, 1805541               |
| P,W-Co <sub>3</sub> N NWA/NF                                | 41                                       | 40                                  | <i>Nat. Commun.</i> 2020, 11, 1853                         |
| P-Fe <sub>3</sub> N@NC NSs/IF                               | 102                                      | 68.59                               | <i>Small</i> <b>2020</b> , 16, 2001980                     |
| Ru-Mo <sub>2</sub> N                                        | 16                                       | 35                                  | <i>Nano Energy</i> <b>2020</b> , 75, 104981                |
| P-MoP/Mo <sub>2</sub> N                                     | 89                                       | 78                                  | <i>Angew. Chem. Int. Ed.</i> <b>2021</b> , 60, 6673        |
| Ni <sub>3</sub> N-V <sub>2</sub> O <sub>3</sub> @NF         | 57                                       | 50                                  | <i>Appl. Catal. B: Environ.</i> <b>2021</b> , 286, 119882  |
| Ni <sub>3</sub> N-Co <sub>3</sub> N PNAs/NF                 | 43                                       | 35.1                                | <i>Angew. Chem. Int. Ed.</i> <b>2021</b> , 60, 5984        |
| Ru-CoN/Ti <sub>3</sub> C <sub>2</sub> T <sub>x</sub> MXene  | 48.8                                     | 44.1                                | This work                                                  |

**Table S2.** A comparison of OER performances of Ru-CoN/Ti<sub>3</sub>C<sub>2</sub>T<sub>x</sub> MXene with recently reported TMN-based electrocatalysts in 1.0 M KOH.

| Catalyst                                                   | $\eta$ (mV) at<br>10 mA cm <sup>-2</sup> | Tafel slope<br>mV dec <sup>-1</sup> | Reference                                                         |
|------------------------------------------------------------|------------------------------------------|-------------------------------------|-------------------------------------------------------------------|
| Co <sub>4</sub> N NW/CC                                    | 257                                      | 44                                  | <i>Angew. Chem. Int. Ed.</i> <b>2015</b> , <i>54</i> , 14710      |
| TiN@Ni <sub>3</sub> N                                      | 350                                      | 93.7                                | <i>J. Mater. Chem. A</i> <b>2016</b> , <i>4</i> , 5713            |
| Ni <sub>3</sub> FeN-NPs                                    | 280                                      | 46                                  | <i>Adv. Energy Mater.</i> <b>2016</b> , <i>6</i> , 1502585        |
| FeCo-Co <sub>4</sub> N/N-C                                 | 280                                      | 40                                  | <i>Adv. Mater.</i> <b>2017</b> , <i>29</i> , 1704091              |
| Ni <sub>3</sub> N/CMFs/Ni <sub>3</sub> N                   | 273                                      | 41.54                               | <i>J. Mater. Chem. A</i> <b>2017</b> , <i>5</i> , 9377            |
| Co <sub>5.47</sub> N NP@N-PC                               | 248                                      | 54                                  | <i>ACS Appl. Mater. Interfaces</i> <b>2018</b> , <i>10</i> , 7134 |
| Co-Ni <sub>3</sub> N/CC                                    | 307                                      | 57                                  | <i>Adv. Mater.</i> <b>2018</b> , <i>30</i> , 1705516              |
| Mn <sub>3</sub> N <sub>2</sub> /NF                         | 270                                      | 101                                 | <i>Angew. Chem. Int. Ed.</i> <b>2018</b> , <i>57</i> , 698        |
| Ni <sub>3</sub> FeN/r-GO                                   | 270                                      | 54                                  | <i>ACS Nano</i> <b>2018</b> , <i>12</i> , 245                     |
| Ni <sub>3</sub> N-NiMoN/CC                                 | 277                                      | 118                                 | <i>Nano Energy</i> <b>2018</b> , <i>44</i> , 353                  |
| Ni <sub>3</sub> N/BP-AG                                    | 233                                      | 42                                  | <i>Small</i> <b>2019</b> , <i>15</i> , 1901530                    |
| Ni <sub>2</sub> Co-N                                       | 214                                      | 53                                  | <i>Appl. Catal. B: Environ.</i> <b>2020</b> , <i>270</i> , 118889 |
| NiFeMnN/Ti <sub>3</sub> C <sub>2</sub> MXene               | 300                                      | 60                                  | <i>Nano Lett.</i> <b>2020</b> , <i>20</i> , 2892                  |
| P-Fe <sub>3</sub> N@NC NSs/IF                              | 270                                      | 89.72                               | <i>Small</i> <b>2020</b> , <i>16</i> , 2001980                    |
| S-Ni <sub>3</sub> FeN/NSG                                  | 260                                      | 76                                  | <i>Appl. Catal. B: Environ.</i> <b>2020</b> , <i>274</i> , 119086 |
| Co <sub>4</sub> N-CeO <sub>2</sub> /GP                     | 239                                      | 37.1                                | <i>Adv. Funct. Mater.</i> <b>2020</b> , <i>30</i> , 1910596       |
| Ni <sub>3</sub> N/Ni@Ni <sub>3</sub> N@CC                  | 229                                      | 55                                  | <i>Nano Energy</i> <b>2020</b> , <i>78</i> , 105355               |
| 2D CoNC@Co <sub>2</sub> N HS                               | 217                                      | 66                                  | <i>Adv. Energy Mater.</i> <b>2020</b> , <i>10</i> , 2002214       |
| Ru-CoN/Ti <sub>3</sub> C <sub>2</sub> T <sub>x</sub> MXene | 238                                      | 68                                  | This work                                                         |

**Table S3.** Summary of recent reported representative of bifunctional TMN-based catalysts for overall water-splitting in 1.0 M KOH.

| Catalyst                                                   | Potential (V) at<br>10 mA cm <sup>-2</sup> | Reference                                                 |
|------------------------------------------------------------|--------------------------------------------|-----------------------------------------------------------|
| Fe <sub>2</sub> Ni <sub>2</sub> N/NF                       | 1.65                                       | <i>Inorg. Chem. Front.</i> <b>2016</b> , 3, 630           |
| TiN@Ni <sub>3</sub> N                                      | 1.64                                       | <i>J. Mater. Chem. A</i> <b>2016</b> , 4, 5713            |
| Ni <sub>3</sub> N/CMFs/Ni <sub>3</sub> N                   | 1.59                                       | <i>J. Mater. Chem. A</i> , <b>2017</b> , 5, 9377          |
| NiMoN                                                      | 1.563                                      | <i>J. Mater. Chem. A</i> , <b>2017</b> , 5, 13648         |
| CoN-Ni <sub>3</sub> N/CC                                   | 1.56                                       | <i>J. Mater. Chem. A</i> , <b>2018</b> , 6, 4466          |
| Ni <sub>3</sub> FeN/r-GO                                   | 1.60                                       | <i>ACS Nano</i> <b>2018</b> , 12, 245                     |
| Co <sub>4</sub> N-VN <sub>1-x</sub> O <sub>x</sub> @CC     | 1.64                                       | <i>Appl. Catal. B: Environ.</i> <b>2019</b> , 241, 521    |
| FeOOH@Co <sub>4</sub> N/SSM                                | 1.59                                       | <i>ACS Appl. Mater. Interfaces</i> <b>2019</b> , 11, 5152 |
| WN-Ni(OH) <sub>2</sub> @CFP                                | 1.705*                                     | <i>ACS Catal.</i> <b>2020</b> , 10, 13323                 |
| P-Fe <sub>3</sub> N@NC NSs/IF                              | 1.61                                       | <i>Small</i> <b>2020</b> , 16, 2001980                    |
| Co <sub>4</sub> N@NC                                       | 1.561                                      | <i>ACS Energy Lett.</i> <b>2020</b> , 5, 692              |
| FeOOH/Ni <sub>3</sub> N                                    | 1.58                                       | <i>Appl. Catal. B: Environ.</i> <b>2020</b> , 269, 118600 |
| Ni <sub>2</sub> Co-N/CC                                    | 1.59                                       | <i>Appl. Catal. B: Environ.</i> <b>2020</b> , 270, 118889 |
| SFCNF/Co <sub>1-x</sub> S@CoN                              | 1.58                                       | <i>Small</i> <b>2020</b> , 16, 2002432                    |
| 2D CoNC@Co <sub>2</sub> N HS-IN-CP                         | 1.52                                       | <i>Adv. Energy Mater.</i> <b>2020</b> , 10, 2002214       |
| Co/WN-600                                                  | 1.51                                       | <i>J. Mater. Chem. A</i> , <b>2020</b> , 8, 22938         |
| Co <sub>4</sub> N-CeO <sub>2</sub> /GP                     | 1.507                                      | <i>Adv. Funct. Mater.</i> <b>2020</b> , 30, 1910596       |
| Ru-CoN/Ti <sub>3</sub> C <sub>2</sub> T <sub>x</sub> MXene | 1.52                                       | This work                                                 |

\* Potential at 20 mA cm<sup>-2</sup>
